# Supplementary material for: Behavioral responses of individual blue whales (Balaenoptera musculus) to mid-frequency military sonar
Source: Oxford University Press journal article supplement (doi:10.1242/jeb.190637), 2019-03-01
Supplement: jeb190637supp.pdf [file jeb190637supp.pdf]

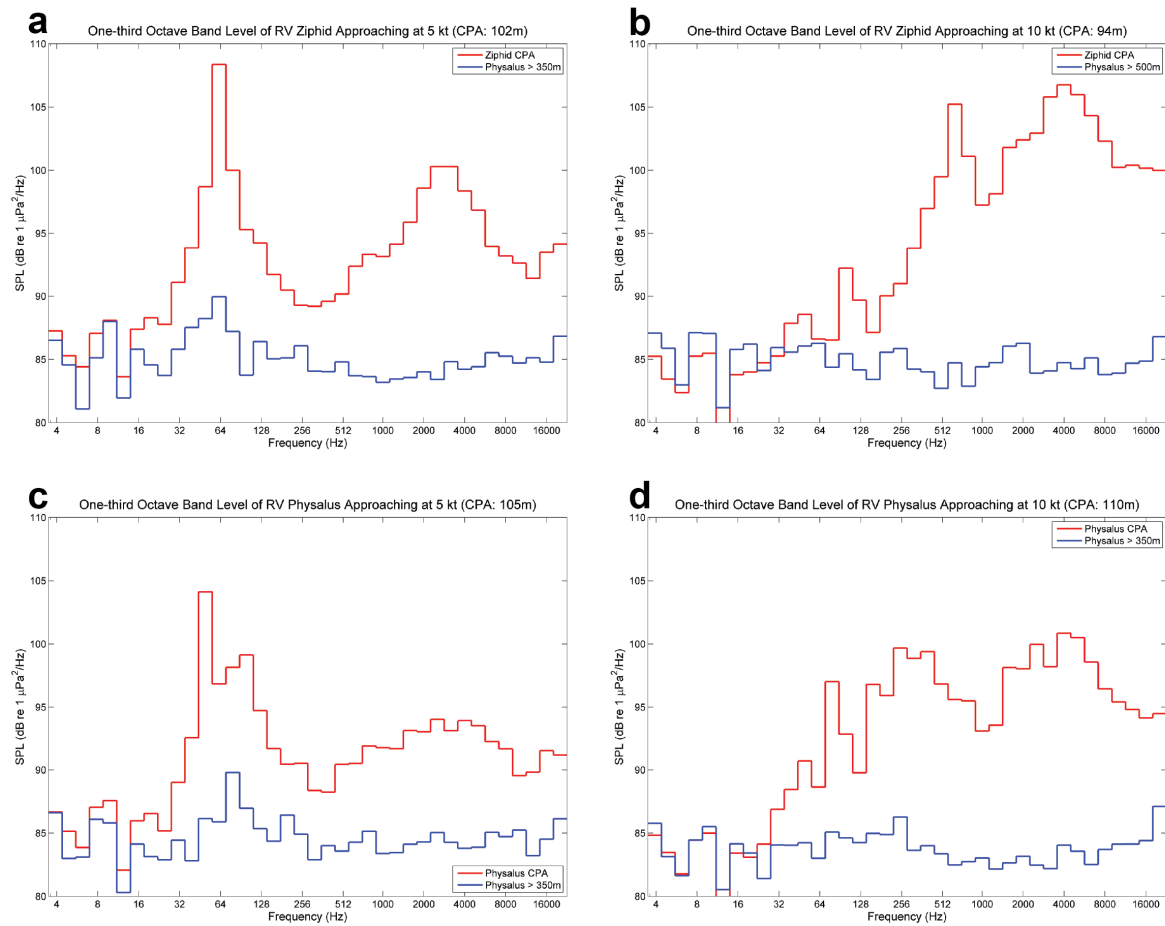

**Figure S1.** One-third-octave band levels for radiated noise from RHIB *Ziphid* during close approaches (~100m) to recording buoys at controlled speeds of 5 kt (panel a) and 10 kt (b) and from RHIB *Physalus* during close approaches (~100m) to recording buoys at controlled speeds of 5 kt (c) and 10 kt (d)

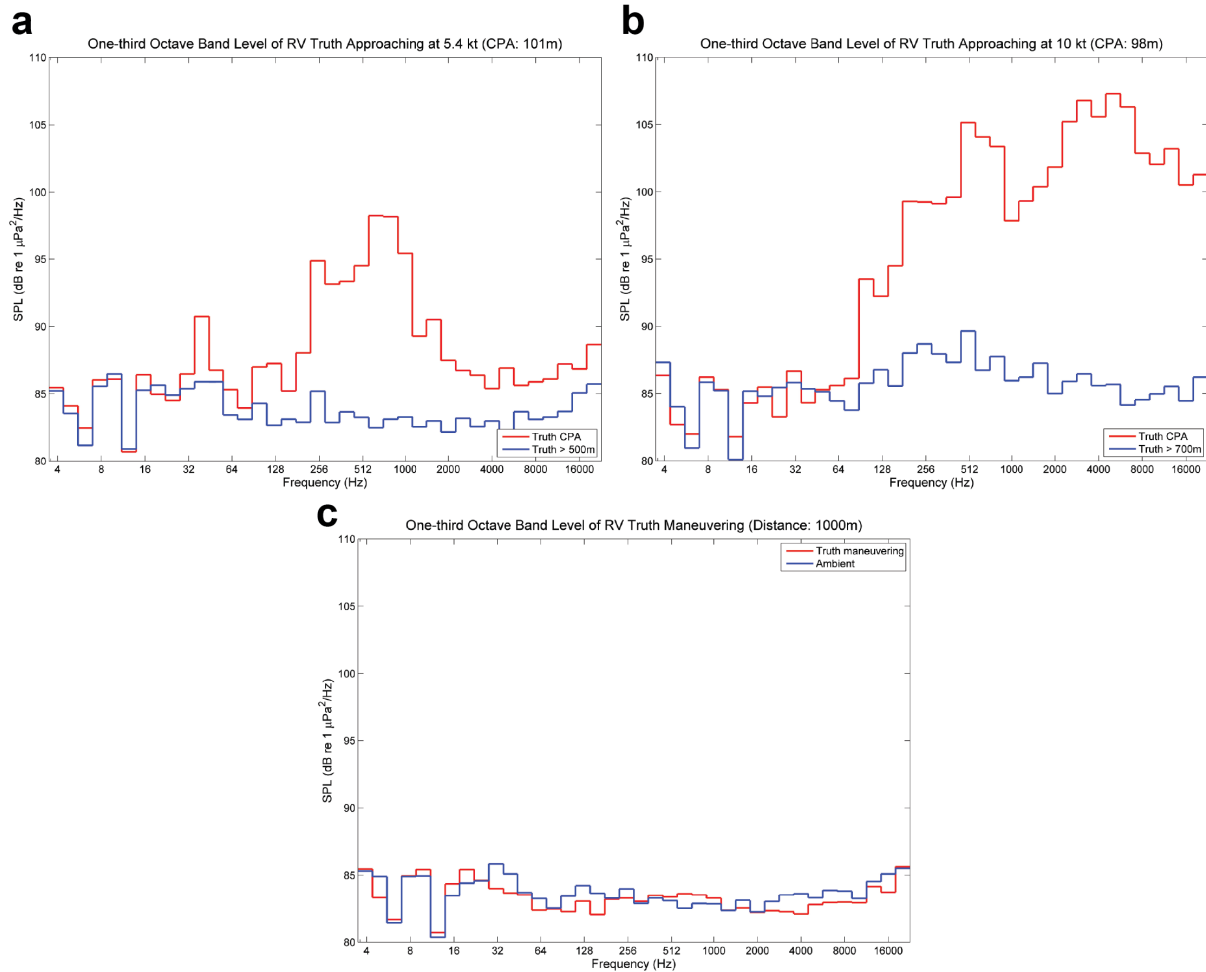

**Figure S2.** One-third-octave band levels for radiated noise from *R/V Truth* during close approaches ( $\sim 100\text{m}$ ) to recording buoys at controlled speeds of 5 kt (panel a) and 10 kt (b). Also shown are one-third-octave band levels for radiated noise from *R/V Truth* during maneuvering at a range to from the recording buoy ( $\sim 1000\text{m}$ ) typical of ranges to whales during CEEs (c).

**Behavioral State: Deep-Feeding**  
**Exposure Type: MFAS**  
**Subject ID: bw11\_210b**  
**CEE Date: 29 July 2011**  
**CEE Number: 2011\_01**

**Time of CEE: 15:25 – 15:55**  
**Location: Point Arguelo**  
**Other animals in CEE? Yes - bw11\_210a**  
**Source-receiver range: 800 m**  
**Max RL: SPLmax: 165; cSEL: 171**

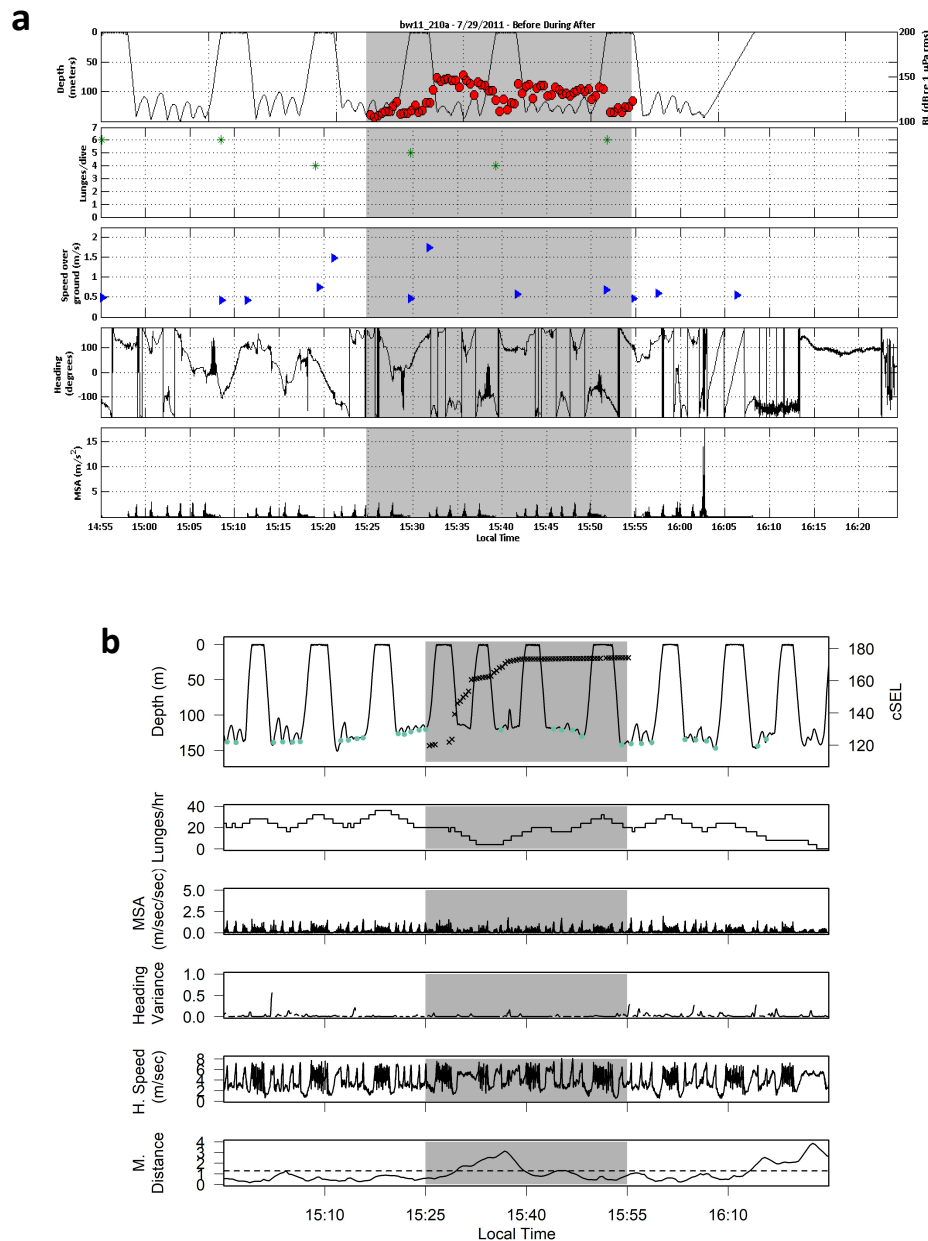

**Figure S3. Expert scoring data plots (a)<sup>1</sup> and Mahalanobis distance plots (b) for bw11\_210b.**

<sup>1</sup> NOTE: This is the exact data plot used during expert scoring. After their analysis it was identified that the dive axis is off by an order of magnitude and this was a deep diving whale with maximum dive depths to 130m (as opposed to 13m). This was discussed *post hoc* with all members of both scoring groups, all of whom agreed this would have no bearing on the changes identified or scores assigned.

**Behavioral State: Deep-Feeding**  
**Exposure Type: PRN**  
**Subject ID: bw11\_218b**  
**CEE Date: 06 August 2011**  
**CEE Number: 2011\_06**

**Time of CEE: 17:39 – 18:02**  
**Location: San Pedro Basin**  
**Other animals in CEE? Yes - bw11\_218a**  
**Source-receiver range: 1200 m**  
**Max RL: SPLmax: 161; cSEL: 168**

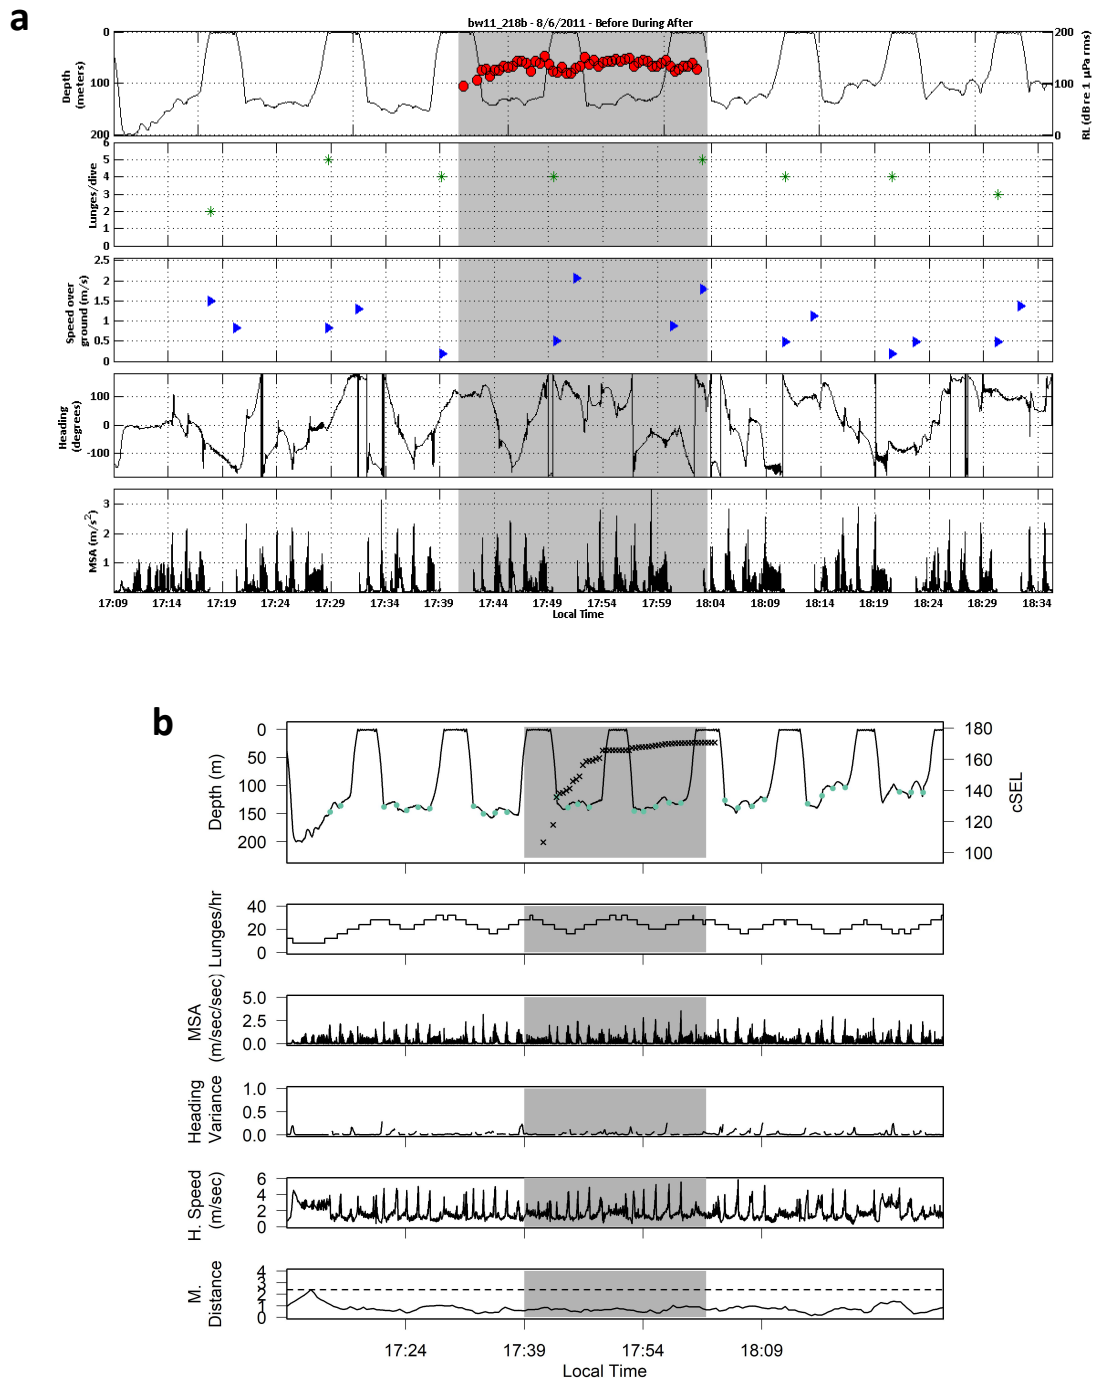

**Figure S4. Expert scoring data plots (a) and Mahalanobis distance plots (b) for bw11\_218b.**

**Behavioral State: Shallow-Feeding**  
**Exposure Type: Control**  
**Subject ID: bw13\_207a**  
**CEE Date: 30 July 2013**  
**CEE Number: 2013\_06**

**Time of CEE: 17:44 – 18:14**  
**Location: San Pedro Channel**  
**Other animals in CEE? No**  
**Source-receiver range: 500 m**  
**Max RL: SPLmax: n/a, CSEL: n/a**

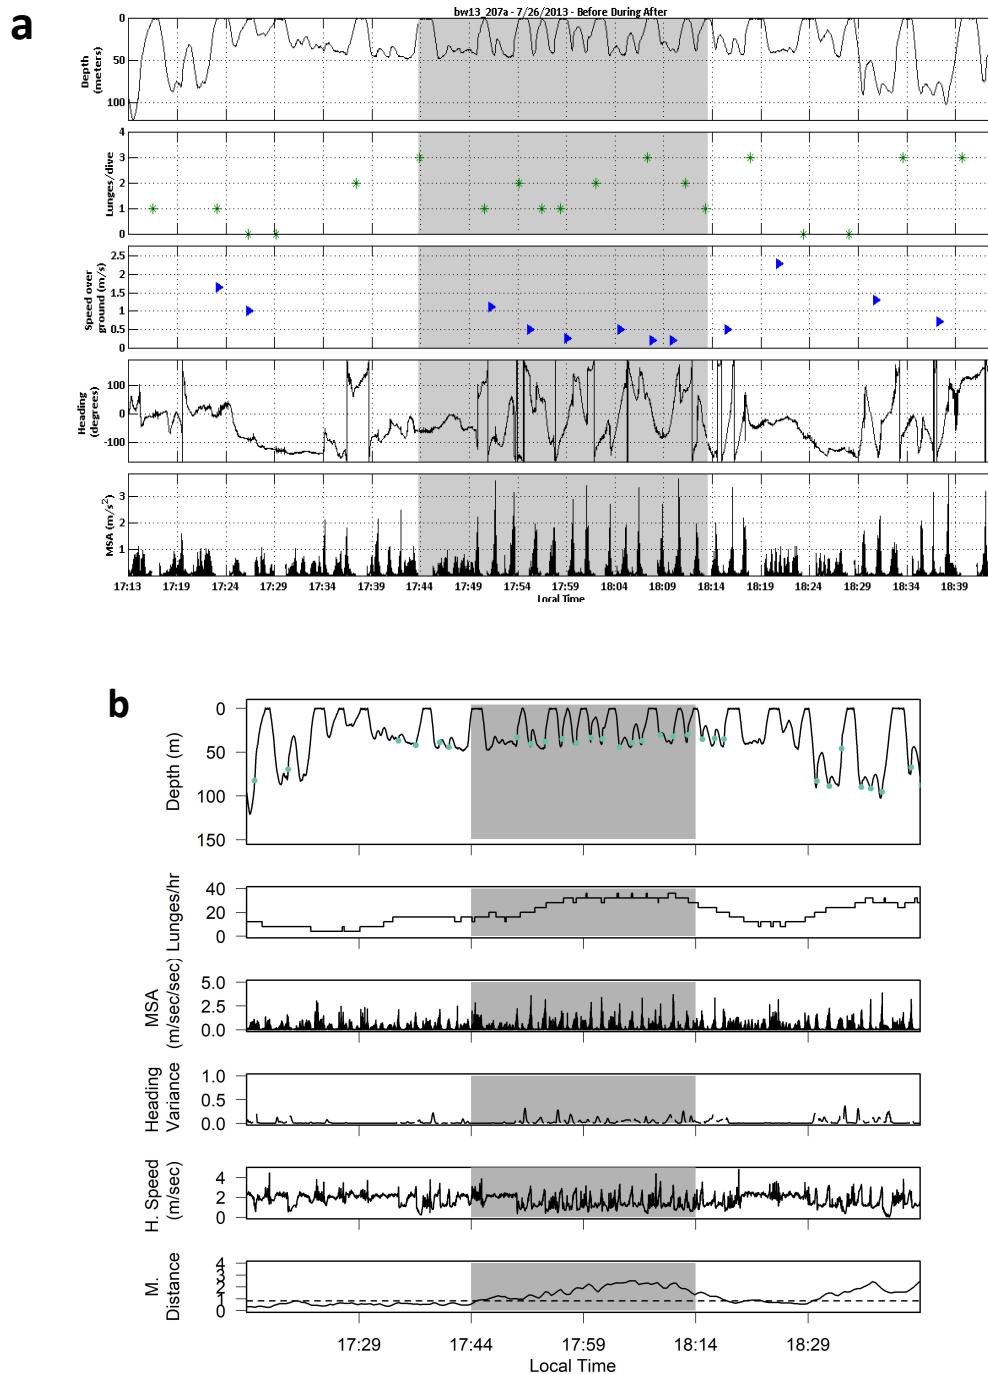

**Figure S5. Expert scoring data plots (a) and Mahalanobis distance plots (b) for bw13\_207a.**

**Table S1. Expert scoring and Mahalanobis distance results for bw11\_210b, bw11\_218b, and bw13\_207a.**

| Subject   | Change-Point Detection Method    | Change Detected? | Change Point Onset Time | Exposure RL at Change Point or Max (if no change) |     | Expert Scored Severity                                                                                                                           | Expert Scoring Confidence |
|-----------|----------------------------------|------------------|-------------------------|---------------------------------------------------|-----|--------------------------------------------------------------------------------------------------------------------------------------------------|---------------------------|
|           |                                  |                  |                         | cSEL                                              | SPL |                                                                                                                                                  |                           |
| bw11_210b | Expert Scoring Group I           | Yes              | 15:29                   | 119                                               | 117 | [7] Avoidance of sound source<br>[6] Moderate cessation of feeding                                                                               | High                      |
|           | Expert Scoring Group II          | Yes              | 15:26-15:28             | 119                                               | 117 | [7] Avoidance of sound source<br>[5] Minor cessation of feeding<br>[4] Change in dive profile<br>[4] Increase in speed<br>[3] Orienting response | High                      |
|           | Expert Scoring Adjudicated FINAL | YES              | 15:28                   | 119                                               | 117 | [7] Avoidance of sound source<br>[6] Moderate cessation of feeding                                                                               | HIGH                      |
|           | Mahalanobis Distance             | YES              | 15:29                   | 119                                               | 117 | -                                                                                                                                                | -                         |
| bw11_218b | Expert Scoring Group I           | No               | None                    | 168                                               | 161 | None                                                                                                                                             | High                      |
|           | Expert Scoring Group II          | No               | None                    | 168                                               | 161 | None                                                                                                                                             | High                      |
|           | Expert Scoring Adjudicated FINAL | NO               | NONE                    | 168                                               | 161 | NONE                                                                                                                                             | HIGH                      |
|           | Mahalanobis Distance             | NO               | NONE                    | 168                                               | 161 | -                                                                                                                                                | -                         |
| bw13_207a | Expert Scoring Group I           | No               | None                    | n/a                                               | n/a | None: Change in movement identified to begin before CEE                                                                                          | Moderate                  |
|           | Expert Scoring Group II          | No               | None                    | n/a                                               | n/a | None: Noted change before CEE and onset of foraging                                                                                              | Moderate                  |
|           | Expert Scoring Adjudicated FINAL | NO               | NONE                    | n/a                                               | n/a | NONE                                                                                                                                             | MODERATE                  |
|           | Mahalanobis Distance             | YES              | 17:44                   | n/a                                               | n/a | -                                                                                                                                                | -                         |
